# Supplementary material
Source: Springer Nature journal article supplement (https://www.springermedizin.de/resource/supplementary/12876_2009_393_MOESM1_ESM.pdf/9436948)

FUJINON  
2007/03/23  
09:13:38

FILM 00  
AVE  
1/60

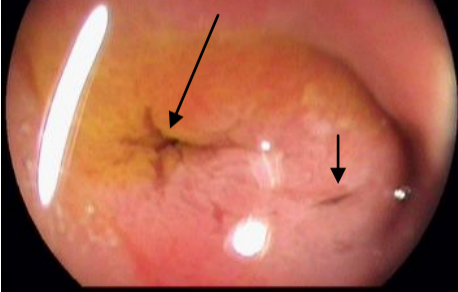

Supplement: MOESM1 [file 9436948]
